# Supplementary material
Source: PubMed Central journal article supplement (PMC9444297)

**Supplemental Table 1. Demographics of the 96 Healthy Subjects from the Brigham and Women’s Hospital PhenoGenetic Cohort Involved in the NK Cytometric Profiling.**

| <b>PARAMETER</b>               | <b>VALUE</b>   |
|--------------------------------|----------------|
| Age (years, Mean $\pm$ SD)     | 27.7 $\pm$ 8.8 |
| Sex (%)                        |                |
| Female                         | 57.3           |
| Male                           | 42.7           |
| Race and Ethnicity (%)         |                |
| Caucasian, Non-Hispanic        | 71.9           |
| Caucasian, Hispanic            | 4.2            |
| African American, Non-Hispanic | 8.3            |
| East Asian                     | 6.2            |
| Multi-racial or others         | 9.3            |

**Supplemental Table 2. Association between the candidate SNP (rs9916629<sup>C</sup>) and the Frequency of NKG2A expressing NK cells Using Additive, Dominant and Recessive Models.**

| VARIABLE                           | UNADJUSTED          |         | MULTIVARIATE*        |         |
|------------------------------------|---------------------|---------|----------------------|---------|
|                                    | Direction of Effect | P       | Direction of Effect* | P*      |
| <b>NKG2A/NK</b>                    |                     |         |                      |         |
| Additive                           | ↑                   | 0.00046 | ↑                    | 0.00020 |
| Dominant                           | ↑                   | 0.00051 | ↑                    | 0.00022 |
| Recessive                          | ↑                   | 0.096   | ↑                    | 0.081   |
| <b>NKG2A/CD56<sup>bright</sup></b> |                     |         |                      |         |
| Additive                           | ↓                   | 0.62    | ↓                    | 0.74    |
| Dominant                           | ↓                   | 0.24    | ↓                    | 0.31    |
| Recessive                          | ↓                   | 0.29    | ↓                    | 0.27    |
| <b>NKG2A/CD56<sup>dim</sup></b>    |                     |         |                      |         |
| Additive                           | ↑                   | 0.0024  | ↑                    | 0.0017  |
| Dominant                           | ↑                   | 0.0016  | ↑                    | 0.0011  |
| Recessive                          | ↑                   | 0.22    | ↑                    | 0.22    |

Refer to Table 2 for the median percentage of expression of NKG2A/NK, NKG2A/CD56<sup>bright</sup>, and NKG2A/CD56<sup>dim</sup> for the three genotypes of rs9916629. Direction of effect is relative to the C allele and is determined from the beta value. \* In the multivariate analysis, association between rs9916629 and the phenotype was adjusted for age and sex as covariates.

**Supplemental Table 3. Association between the candidate SNP (rs9916629<sup>C</sup>) and the RNA expression profile in NK cells in a subset of the healthy cohort (n=20: 2 with CC, 9 with CT, and 9 with TT genotype).**

| Gene Symbol | Probe ID     | Beta values | P-value  |
|-------------|--------------|-------------|----------|
| TRPC4AP     | ILMN_2402805 | 0.40        | 0.000027 |
| DNAI2       | ILMN_1756921 | -0.23       | 0.000120 |
| AGPAT3      | ILMN_1661373 | 0.18        | 0.000224 |
| HS.258077   | ILMN_1838281 | 0.19        | 0.000263 |
| CECR7       | ILMN_1773764 | -0.16       | 0.000399 |
| RAD51       | ILMN_2363027 | -0.12       | 0.000438 |
| FBXW8       | ILMN_2342793 | -0.20       | 0.000471 |
| PKHD1       | ILMN_1720034 | -0.21       | 0.000527 |
| LGALS2      | ILMN_1687306 | 0.28        | 0.000592 |
| MUTYH       | ILMN_2277537 | 0.22        | 0.000613 |
| S100A13     | ILMN_2407168 | -0.13       | 0.000706 |
| COL20A1     | ILMN_1753182 | -0.11       | 0.000924 |
| TAGLN       | ILMN_2400935 | 0.22        | 0.000940 |
| RPS27A      | ILMN_1755883 | -0.21       | 0.000963 |
| PGM5        | ILMN_1709590 | 0.23        | 0.001001 |
| HSPA6       | ILMN_1806165 | 0.41        | 0.001172 |
| MGAT4A      | ILMN_1755643 | -0.42       | 0.001242 |
| THRA        | ILMN_1661683 | -0.22       | 0.001555 |
| NPTXR       | ILMN_1684143 | -0.16       | 0.001566 |
| ABCC12      | ILMN_1762093 | -0.17       | 0.001703 |
| ANTXR2      | ILMN_1812926 | 0.43        | 0.001789 |
| CALML5      | ILMN_1749118 | 0.17        | 0.002021 |
| LHFPL1      | ILMN_1725031 | 0.18        | 0.002125 |
| UPK3B       | ILMN_1701565 | 0.25        | 0.002259 |
| ZBED5       | ILMN_1664424 | 0.16        | 0.002354 |
| FOXI2       | ILMN_1808388 | -0.21       | 0.002553 |
| PSMG3       | ILMN_1802627 | -0.13       | 0.002707 |
| OBFC2A      | ILMN_1785852 | 0.24        | 0.002711 |
| HDAC7A      | ILMN_1728521 | 0.24        | 0.002736 |
| RNF141      | ILMN_1815010 | 0.19        | 0.002798 |
| LSR         | ILMN_1749396 | 0.19        | 0.002923 |
| COL12A1     | ILMN_1741695 | 0.16        | 0.003064 |
| C7ORF50     | ILMN_1718336 | -0.29       | 0.003110 |
| HS.344169   | ILMN_1890120 | 0.17        | 0.003168 |
| TOMM7       | ILMN_2087060 | -0.18       | 0.003206 |

|               |                     |             |                 |
|---------------|---------------------|-------------|-----------------|
| DPP7          | ILMN_2252309        | -0.29       | 0.003262        |
| HS.576768     | ILMN_1845602        | 0.13        | 0.003338        |
| GZMM          | ILMN_1690561        | -0.28       | 0.003424        |
| RMND1         | ILMN_1694533        | 0.11        | 0.003441        |
| CASK          | ILMN_1654773        | 0.15        | 0.003503        |
| MGC5139       | ILMN_1660935        | 0.14        | 0.003507        |
| GART          | ILMN_1793220        | 0.13        | 0.003543        |
| DUS1L         | ILMN_1653342        | -0.16       | 0.003588        |
| <b>TBX21</b>  | <b>ILMN_1692714</b> | <b>0.17</b> | <b>0.003738</b> |
| COL4A3BP      | ILMN_1680109        | 0.19        | 0.003789        |
| PKN1          | ILMN_1662687        | 0.22        | 0.003792        |
| BCAT1         | ILMN_1766169        | 0.29        | 0.003849        |
| RBPJ          | ILMN_1708537        | -0.24       | 0.003925        |
| C12ORF62      | ILMN_1804656        | -0.24       | 0.003935        |
| CAND2         | ILMN_2073592        | -0.11       | 0.003955        |
| PRDM8         | ILMN_1802082        | 0.24        | 0.003999        |
| GSTM3         | ILMN_1736184        | -0.15       | 0.004167        |
| CHST13        | ILMN_1734707        | 0.37        | 0.004443        |
| CHN2          | ILMN_2403237        | 0.24        | 0.004781        |
| ZFAND2A       | ILMN_1694671        | -0.31       | 0.004794        |
| RUSC2         | ILMN_1810037        | 0.14        | 0.004824        |
| HS.578136     | ILMN_1902508        | 0.16        | 0.004826        |
| RAB13         | ILMN_1788180        | 0.20        | 0.004858        |
| HIST1H2BJ     | ILMN_1658702        | -0.25       | 0.004946        |
| DGCR2         | ILMN_1713301        | 0.15        | 0.005002        |
| HS.538759     | ILMN_1894930        | 0.15        | 0.005093        |
| PANK2         | ILMN_1708095        | 0.15        | 0.005310        |
| PLAC2         | ILMN_1725831        | -0.12       | 0.005452        |
| PKP4          | ILMN_1749410        | 0.19        | 0.005623        |
| RTN2          | ILMN_1685357        | -0.21       | 0.005635        |
| ARL6IP4       | ILMN_2393144        | -0.16       | 0.005726        |
| CHCHD9        | ILMN_1677237        | -0.15       | 0.005905        |
| HCG27         | ILMN_1746436        | 0.21        | 0.005937        |
| TOP2B         | ILMN_1777663        | 0.24        | 0.005963        |
| LOC654114     | ILMN_1698835        | 0.16        | 0.005970        |
| DKFZP667M2411 | ILMN_1802518        | -0.15       | 0.005982        |
| ANKRD35       | ILMN_1798006        | -0.17       | 0.006060        |
| AP1S1         | ILMN_1751345        | -0.12       | 0.006279        |
| RHOT1         | ILMN_1731484        | 0.19        | 0.006285        |
| RIMS3         | ILMN_1742382        | -0.17       | 0.006293        |
| C6ORF25       | ILMN_1709799        | 0.23        | 0.006352        |
| MBD3          | ILMN_1698491        | -0.14       | 0.006380        |
| ANKRD35       | ILMN_2145153        | 0.11        | 0.006572        |
| CCHCR1        | ILMN_1674051        | 0.13        | 0.006627        |
| SFRS9         | ILMN_1760683        | 0.18        | 0.006722        |
| PAFAH2        | ILMN_1682919        | -0.23       | 0.006884        |

|           |              |       |          |
|-----------|--------------|-------|----------|
| MTP18     | ILMN_2372040 | -0.37 | 0.006904 |
| MICALCL   | ILMN_1743232 | 0.18  | 0.006922 |
| TMED1     | ILMN_1693045 | -0.22 | 0.006950 |
| DTX2      | ILMN_2275098 | 0.26  | 0.006986 |
| NR2F6     | ILMN_1672080 | 0.15  | 0.007105 |
| HS.520750 | ILMN_1851677 | 0.14  | 0.007256 |
| ZNF655    | ILMN_1728528 | -0.10 | 0.007307 |
| LOC654254 | ILMN_1734939 | -0.16 | 0.007310 |
| FAM116B   | ILMN_1659029 | 0.25  | 0.007326 |
| KLC4      | ILMN_1687873 | 0.13  | 0.007337 |
| CREB5     | ILMN_1728677 | 0.13  | 0.007602 |
| RGPD1     | ILMN_2116827 | 0.18  | 0.007613 |
| LOC130773 | ILMN_1672009 | -0.23 | 0.007704 |
| C17ORF68  | ILMN_1702676 | 0.18  | 0.007707 |
| IL6R      | ILMN_1696394 | 0.16  | 0.007715 |
| HEY2      | ILMN_1682034 | -0.19 | 0.007759 |
| PPHLN1    | ILMN_1805788 | -0.13 | 0.007790 |
| FEZ1      | ILMN_1794106 | -0.16 | 0.008447 |
| SMAD7     | ILMN_2203891 | -0.26 | 0.008448 |
| ARID3A    | ILMN_1670130 | 0.24  | 0.008453 |
| SMYD2     | ILMN_1721605 | -0.13 | 0.008488 |
| LHX6      | ILMN_1683752 | -0.22 | 0.008493 |
| KIAA0232  | ILMN_1795704 | 0.10  | 0.008524 |
| HS.560740 | ILMN_1887928 | 0.26  | 0.008713 |
| SDSL      | ILMN_1750674 | 0.34  | 0.008811 |
| LOC648605 | ILMN_1773819 | 0.19  | 0.008827 |
| RAD51L1   | ILMN_1727831 | 0.12  | 0.009008 |
| PHF5A     | ILMN_1775901 | -0.22 | 0.009070 |
| HS.527387 | ILMN_1893798 | 0.18  | 0.009127 |
| UXS1      | ILMN_1776334 | 0.17  | 0.009174 |
| LARP5     | ILMN_1766222 | 0.22  | 0.009205 |
| KIAA1683  | ILMN_2158003 | 0.16  | 0.009263 |
| CELSR1    | ILMN_1694482 | -0.08 | 0.009430 |
| FABP4     | ILMN_1773006 | 0.14  | 0.009437 |
| RAB3IP    | ILMN_1803197 | 0.14  | 0.009546 |
| LOC143543 | ILMN_1664602 | -0.18 | 0.009555 |
| FLOT2     | ILMN_1726222 | 0.15  | 0.009589 |
| ZFYVE27   | ILMN_1793621 | 0.15  | 0.009663 |
| FRAT2     | ILMN_1788213 | 0.23  | 0.009664 |
| BACE1     | ILMN_1797804 | 0.22  | 0.009738 |
| HS.542848 | ILMN_1873394 | 0.16  | 0.009756 |
| PXN       | ILMN_1684440 | -0.22 | 0.009789 |
| ATP5B     | ILMN_1772132 | 0.21  | 0.009815 |
| TARBP2    | ILMN_1729767 | -0.17 | 0.009835 |
| IFIT1     | ILMN_1707695 | 0.40  | 0.009936 |

---

**Supplemental Figure 1. Pathway analysis of eQTL results of rs9916629 and RNA expression profile from bulk CD3<sup>-</sup>CD56<sup>+</sup> NK cells.**

Gene expression relative to the C allele of rs9916629. Using the Ingenuity Pathways Analysis software suite, we illustrate the network of genes whose expression is either upregulated (red) or downregulated (green) relative to the rs9916629<sup>C</sup> allele in healthy subjects. The magnitude of each gene's association is reflected by the intensity of the color, with brighter color indicating a stronger association between rs9916629 C allele and RNA expression. When available, arrows point to the downstream genes within the network. A white color denotes a gene found in the associated pathway but which failed to meet a nominal  $P < 0.05$  threshold for association of its RNA expression with rs9916629. The shapes of each gene symbol denote the class of gene as defined by the Ingenuity Pathways application as denoted in the upper left corner of the figure.

- Transcription factor
- Transmembrane receptor
- ◇ Peptidase
- ◇ Enzyme
- ▽ Kinase
- Cytokine
- Transcription regulator

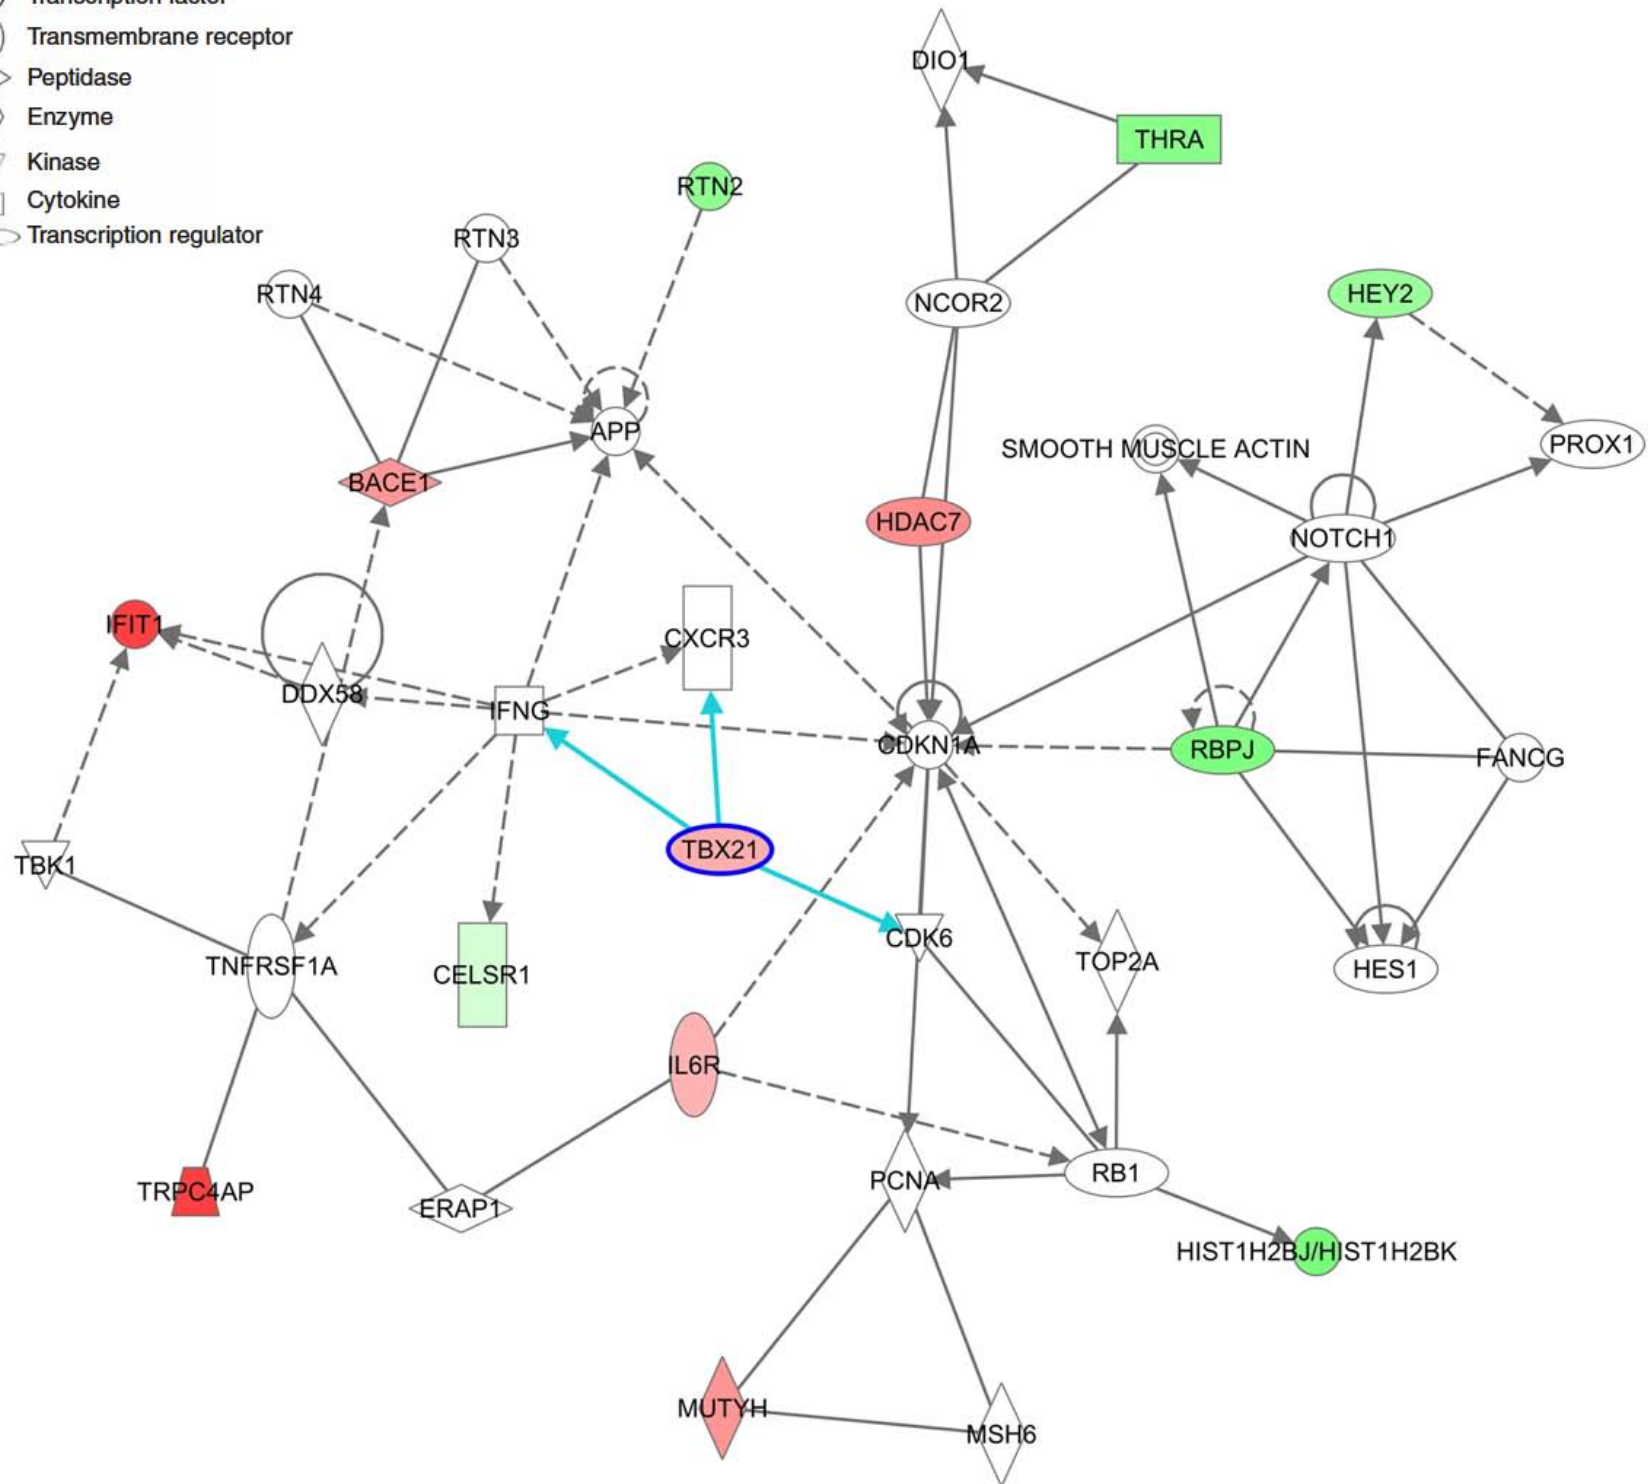

Supplement: NIHMS517062-supplement-Supplementary_Material.pdf [file NIHMS517062-supplement-Supplementary_Material.pdf]
